# Supplementary material for: NMR Investigation of Water Molecular Dynamics in Sulfonated Polysulfone/Layered Double Hydroxide Composite Membranes for Proton Exchange Membrane Fuel Cells
Source: MDPI journal article supplement (doi:10.3390/membranes13070684), 2023-07-22
Supplement: s1 [file s1]

# NMR Investigation of Water Molecular Dynamics in Sulfonated Polysulfone/Layered Double Hydroxide Composite Membranes for PEMFCs

Cataldo Simari<sup>1,2</sup>

<sup>1</sup> Department of Chemistry and Chemical Technologies, University of Calabria, 87036 Rende, Italy; Tel: +39-0984-493385; Fax: +39-0984-492044

<sup>2</sup> National Reference Centre for Electrochemical Energy Storage (GISEL)—INSTM, Via G. Giusti 9, 50121 Firenze, Italy

Spectral deconvolution has been carried out using Lorentzian peak function with the following characteristics:

Number of Parameters=4

Number of Independent Variables=1 (x)

Number of Dependent Variables=1 (y)

[FORMULA]  $\Rightarrow y = y_0 + (2A/\pi) * (w / (4 * (x - x_c)^2 + w^2))$

[Parameters Initialization]  $\Rightarrow x_c = \text{peak\_pos}(x\_y\_curve, \&w, \&y_0, \text{NULL}, \&A);$

$A * = 1.57 * w;$

Number of Duplicates=1

Duplicate Offset=2

Duplicate Unit=3

Peak Center=2

Peak Width=3

Peak Amplitude=4

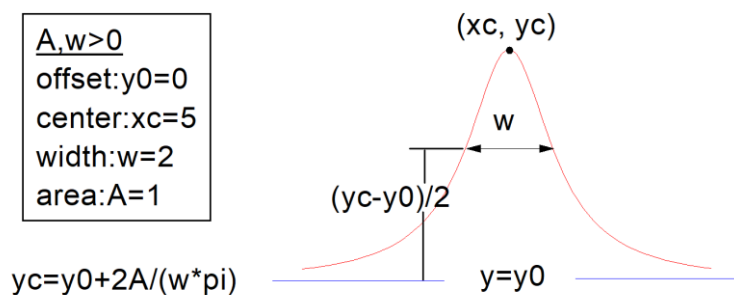

Noteworthy, R2 value for the various spectral deconvolution ranged between 0.9943 and 0.9985 as a clear indication of the goodness of the mathematical fitting model used in this study.

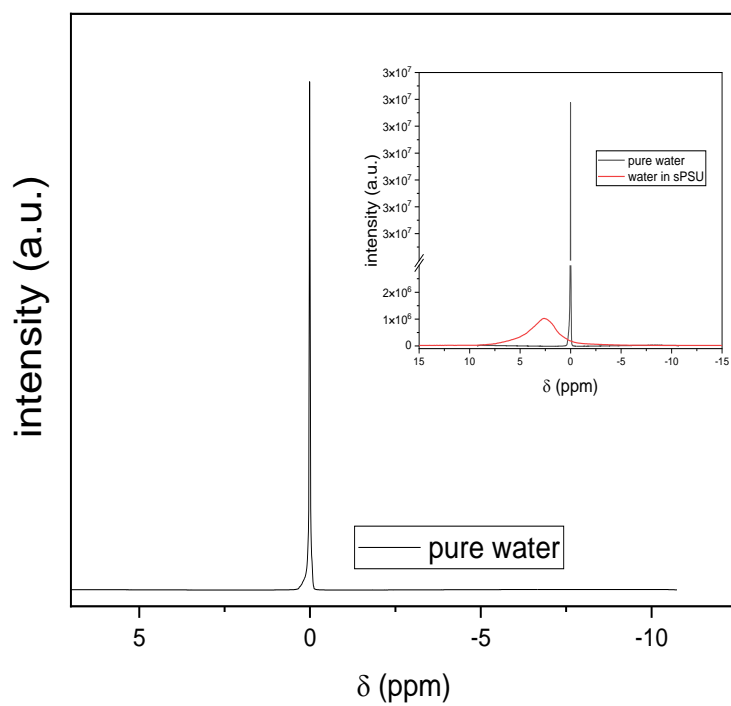

**Figure S1.**  $^1\text{H}$  NMR spectra of pure water.

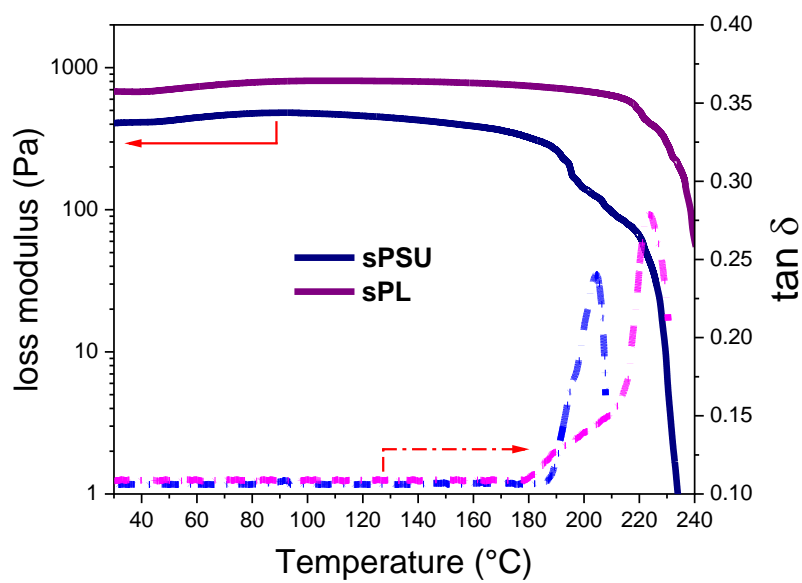

**Figure S2.** Dynamic Mechanical Analysis characterization on sPSU and sPL membranes

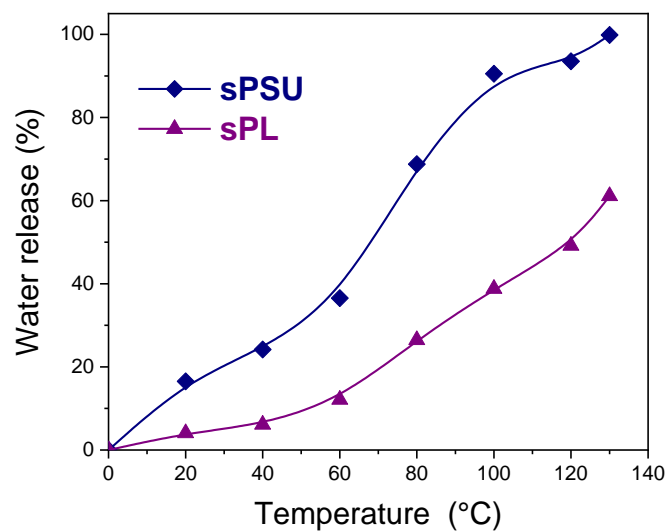

**Figure S3.** Water release behaviors of the sPSU-based membranes as a function of the temperature.

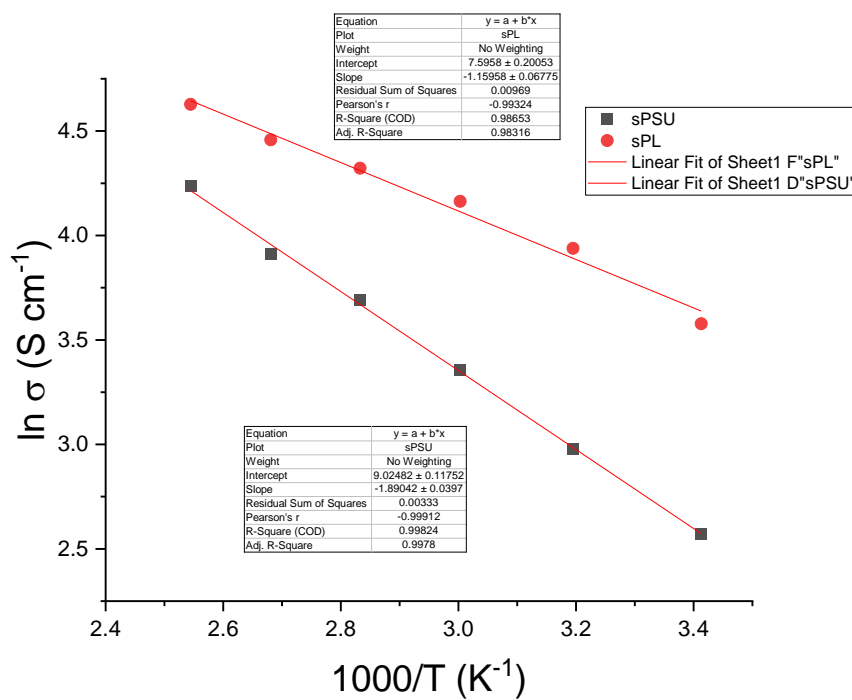

**Figure S4.** Arrhenius plot ( $\ln \sigma$  vs.  $1000/T$ ) for proton conductivity of sPSU and sPL membranes
